# Supplementary material for: Probes for protein adduction in cholesterol biosynthesis disorders: Alkynyl lanosterol as a viable sterol precursor
Source: PubMed Central journal article supplement — Redox Biol. 2017 Feb 24;12:182–90. doi: 10.1016/j.redox.2017.02.013 (PMC5333532; doi:10.1016/j.redox.2017.02.013), 2017-02-24
Supplement: mmc1.pdf [file mmc1.pdf]

Supporting Information for:

## Probes for Protein Adduction in Cholesterol Biosynthesis Disorders. Alkynyl Lanosterol as a Viable Sterol Precursor.

<sup>a</sup>Keri A. Tallman, <sup>a</sup>Hye-Young H. Kim, <sup>b,c,d</sup>Zeljka Korade, <sup>a</sup>Thiago Genaro-Mattos, <sup>a</sup>Phillip  
A. Wages, <sup>a</sup>Wei Liu, and <sup>a,b</sup>Ned A. Porter\*

<sup>a</sup>Department of Chemistry and Vanderbilt Institute of Chemical Biology, <sup>b</sup>Vanderbilt Kennedy Center for  
Research on Human Development, <sup>c</sup>Department of Psychiatry, Vanderbilt University, Nashville, Tennessee  
37235.

d. Current Address: Department of Pediatrics, UNMC, Omaha, NE

Scheme S1. Full synthetic procedures for alkynyl lanosterol.

Scheme S2. Full synthetic procedures for alkynyl lathosterol.

Figure S1. Structure of photo-cleavable azido biotin.

Table S1. Enrichment factors for the 423 proteins found common to the *a*-7-DHC and *a*-Lan experiments and the ranking of each protein based on enrichment.

Scheme S1. Synthesis of  $\alpha$ -Lan.

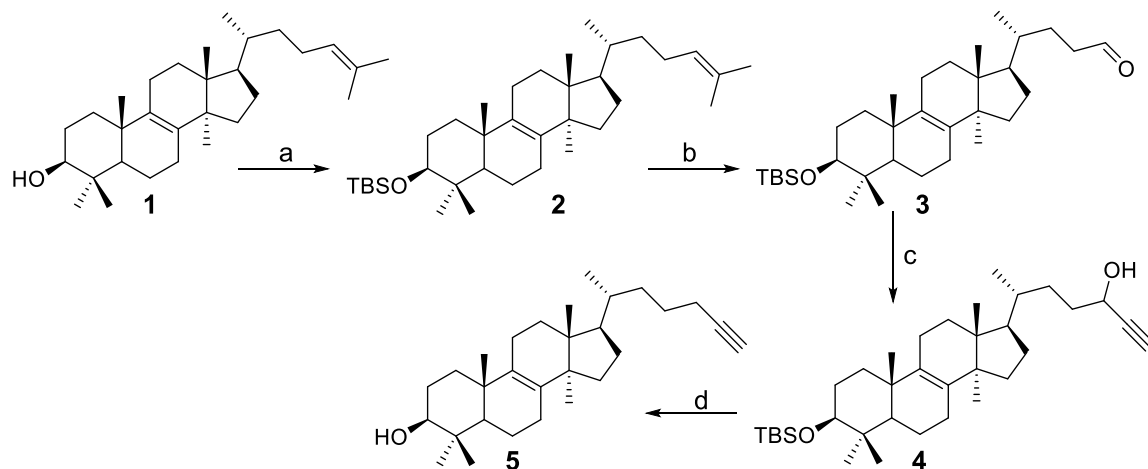

Reagents: a) TBSCl, im, DMF; b) i. O<sub>3</sub>, CH<sub>2</sub>Cl<sub>2</sub>; ii. PPh<sub>3</sub>; c) ethynylmagnesium bromide, THF; d) i. Co<sub>2</sub>(CO)<sub>8</sub>, CH<sub>2</sub>Cl<sub>2</sub>; ii. BH<sub>3</sub>-Me<sub>2</sub>S, TFA; iii. Fe(NO<sub>3</sub>)<sub>3</sub>.

*Synthesis of aldehyde 3.* The aldehyde **3** was synthesized following procedures from the literature. Lanosterol (**1**) was purchased as a mixture of sterols, but the desired aldehyde is separable since the impurities do not undergo ozonolysis. TBDMSCl (2.4 g, 0.016 mol) and imidazole (2.0 g, 0.029 mol) were added to a solution of lanosterol (5.0 g, 0.012 mol) in DMF (60 mL) and heated to 100 °C. The lanosterol dissolved upon heating. After 3 h, the reaction mixture was cooled and diluted with EtOAc. The solution was washed with H<sub>2</sub>O, brine, and dried over MgSO<sub>4</sub>. Purification by column chromatography (10% EtOAc/hexanes) yielded the product (**2**) as a yellow waxy solid (6.2 g, 97%). Ozonolysis was performed by bubbling ozone through a solution of **2** (6.2 g, 0.011 mol) in CH<sub>2</sub>Cl<sub>2</sub> (110 mL) at 0 °C. After 15 min, ozone was stopped and the reaction quenched with PPh<sub>3</sub> (2.8 g, 0.011 mol). After 30 min, the reaction mixture was concentrated. The product was purified by column chromatography (5% EtOAc/hexanes) and isolated as a white powder (1.6 g, 27%). <sup>1</sup>H NMR (CDCl<sub>3</sub>) δ 9.76 (t, 1H, J = 1.9 Hz), 3.19 (dd, 1H, J = 4.9, 10.9 Hz), 2.49-2.28 (m, 2H), 2.10-1.90 (m, 5H), 1.90-1.15 (m, 16H), 0.97 (s, 3H), 0.90 (s, 3H), 0.87 (s, 12H), 0.86 (d, 3H, J = 4.6 Hz), 0.76 (s, 3H), 0.67 (s, 3H), 0.019 (s, 3H), 0.014 (s, 3H); <sup>13</sup>C NMR (CDCl<sub>3</sub>) δ 203.1, 134.7, 134.1, 79.3, 50.4, 50.3, 49.8, 44.5, 41.1, 39.4, 36.9, 36.0, 35.5, 31.0, 30.8, 28.3, 28.2, 28.1, 26.5, 25.9, 24.2, 20.9, 19.2, 18.4, 18.1, 15.9, 15.7, -3.8, -5.0; HRMS (ESI) calculated 514.4201 (M + H), observed 514.4228.

*Synthesis of 4.* Ethynylmagnesium bromide (0.5 M/THF, 2.0 mL, 1.0 mmol) was added to a solution of the aldehyde **3** (0.33 g, 0.64 mmol) in THF (3 mL). After 1 h, the reaction mixture was quenched with saturated NH<sub>4</sub>Cl and extracted with EtOAc. The organics were washed with brine and dried over MgSO<sub>4</sub>. Purification by column chromatography (10% EtOAc/hexanes) afforded the product as a white powder (0.29 g, 83%). <sup>1</sup>H NMR (CDCl<sub>3</sub>) δ 4.32 (dt, 1H, J = 1.7, 5.9 Hz), 3.18 (dd, 1H, J = 4.8, 10.9 Hz), 2.44 (t, 1H, J = 2.0 Hz), 2.05-1.93 (m, 4H), 1.92-1.40 (m, 14H), 1.40-1.00 (m, 6H), 0.95 (s, 3H), 0.90 (d, 3H, J = 5.6 Hz), 0.89 (s, 3H), 0.87 (s, 9H), 0.85 (s, 3H), 0.75 (s, 3H), 0.67 (s, 3H), 0.015 (s, 3H), 0.010 (s, 3H); <sup>13</sup>C NMR (CDCl<sub>3</sub>) δ 134.6, 134.1, 85.0, 79.4, 72.9, 72.7, 62.8, 62.7, 50.4, 50.2, 49.8, 44.4, 39.4, 36.9, 36.0, 35.5, 34.5, 34.4, 31.3, 31.2, 31.0, 30.8, 28.3, 28.2, 28.1, 26.5, 25.9, 24.2, 21.0, 19.2, 18.7, 18.4, 18.1, 15.9, 15.7, -3.8, -5.0; HRMS (ESI) calculated 514.4201 (M + H), observed 514.4228.

*Synthesis of *a*-Lan (5).* Co<sub>2</sub>(CO)<sub>8</sub> (0.37 g, 1.1 mmol) was added to a solution of the alkyne **4** (0.48 g, 0.89 mmol) in CH<sub>2</sub>Cl<sub>2</sub> (9 mL). After 30 min, the reaction mixture was cooled to 0 °C. BH<sub>3</sub>-Me<sub>2</sub>S complex (1 M/CH<sub>2</sub>Cl<sub>2</sub>, 1.1 mL, 1.1 mmol) was added, followed by TFA (0.9 mL, 10% v). After an additional 30 min, the reaction was quenched with H<sub>2</sub>O and extracted with EtOAc. The organic layer was washed with brine and dried over MgSO<sub>4</sub>. The crude product was dissolved in CH<sub>3</sub>CN (7 mL) and MeOH (2 mL). Fe(NO<sub>3</sub>)<sub>3</sub> (1.9 g, 4.6 mmol) was added to the reaction mixture and stirred for 3 h to deprotect the alkyne. The alcohol was also deprotected under these conditions. The workup was repeated as above. The product was isolated as a white powder (0.19 g, 52%) after purification by column chromatography (10 → 20% EtOAc/hexanes). <sup>1</sup>H NMR (CDCl<sub>3</sub>) δ 3.21 (dd, 1H, J = 4.7, 11.4 Hz), 2.15-2.10 (m, 2H), 2.02-1.98 (m, 4H), 1.92 (t, 1H, J = 2.6 Hz), 1.73-1.21 (m, 20H), 0.97 (s, 3H), 0.95 (s, 3H), 0.88 (d, 3H, J = 6.2 Hz), 0.85 (s, 3H), 0.78 (s, 3H), 0.66 (s, 3H); <sup>13</sup>C NMR (CDCl<sub>3</sub>) δ 134.4, 134.3, 84.8, 78.9, 68.0, 50.3, 50.2, 49.8, 44.4, 38.8, 37.0, 36.0, 35.5, 35.3, 30.9, 30.8, 28.1, 27.9, 27.8, 26.4, 25.3, 24.2, 20.9, 19.1, 18.8, 18.6, 18.2, 15.8, 15.7; HRMS (ESI) calculated 410.3543 (M + H), observed 410.3516.

Scheme S2. Synthesis of  $\alpha$ -Lath.

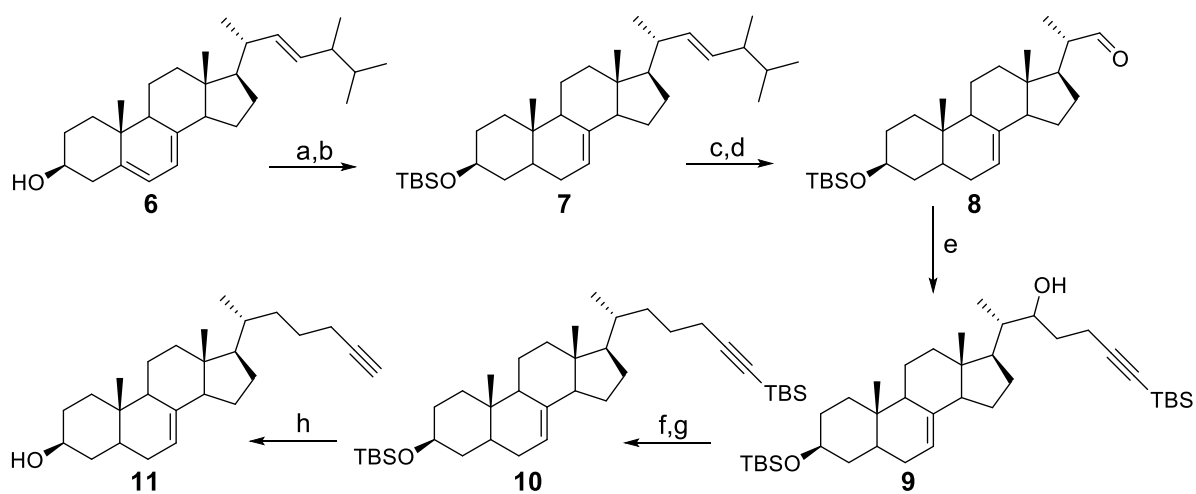

Reagents: a)  $\text{H}_2$ , Raney Ni, EtOAc/THF; b) TBSCl, im, DMF/THF; c)  $\text{OsO}_4$ , NMO, THF/*t*BuOH; d)  $\text{NaIO}_4$ , THF/pH 7 buffer; e) 4-(*tert*-butyldimethylsilyloxy)-1-bromo-3-butyne, Mg, THF; f) MsCl, pyridine; g) LAH/THF; h) TBAF, THF.

*Synthesis of 7.* Raney Ni (5 g) was added to a solution of ergosterol **6** (5.0 g, 0.013 mol) in EtOAc/THF (90 mL, 2:1). The reaction mixture was sparged with  $\text{H}_2$ , then left under a balloon of  $\text{H}_2$  for the duration of the reaction. After 3 h, the reaction mixture was filtered through a pad of Celite, dried over  $\text{MgSO}_4$ , and concentrated. No purification was necessary and the product was isolated as a white powder (4.5 g, 88%).  $^1\text{H}$  NMR ( $\text{CDCl}_3$ )  $\delta$  5.23-5.09 (m, 3H), 3.62-3.52 (m, 1H), 2.00-1.95 (m, 2H), 1.83-1.66 (m, 8H), 1.65-1.21 (m, 14H), 0.99 (d, 3H,  $J = 6.4$  Hz), 0.89 (d, 3H,  $J = 6.8$  Hz), 0.81 (d, 3H,  $J = 4.6$  Hz), 0.79 (d, 3H,  $J = 4.6$  Hz), 0.77 (s, 3H), 0.52 (s, 3H);  $^{13}\text{C}$  NMR ( $\text{CDCl}_3$ )  $\delta$  139.5, 135.6, 131.8, 117.4, 71.0, 55.9, 55.1, 49.4, 43.2, 42.8, 40.4, 40.2, 39.4, 37.9, 37.1, 34.2, 33.0, 31.4, 29.6, 28.1, 22.9, 21.5, 21.1, 19.9, 19.6, 17.6, 13.0, 132.0.

TBSCl (2.2 g, 0.015 mol) and imidazole (1.9 g, 0.028 mol) were added to a solution of this sterol (4.5 g, 0.011 mol) in a mixture of DMF/THF (60 mL, 1:1). A white precipitate formed. After the reaction had stirred overnight, it was diluted with EtOAc and washed with  $\text{H}_2\text{O}$ , brine, and dried over  $\text{MgSO}_4$ . The product was purified by column chromatography (10% EtOAc/hexanes) and isolated as a white powder (5.2 g, 90%).  $^1\text{H}$  NMR ( $\text{CDCl}_3$ )  $\delta$  5.23-5.09 (m, 3H), 3.58-3.49 (m, 1H), 2.02-1.95 (m, 2H), 1.90-1.20 (m, 21H), 0.99 (d, 3H,  $J = 6.6$  Hz), 0.89 (d, 3H,  $J = 6.9$  Hz), 0.87 (s, 9H), 0.82 (d, 3H,  $J = 4.6$  Hz), 0.80 (d, 3H,  $J = 4.6$  Hz), 0.77 (s, 3H),

0.52 (s, 3H), 0.032 (s, 6H);  $^{13}\text{C}$  NMR ( $\text{CDCl}_3$ )  $\delta$  139.5, 135.7, 131.8, 117.5, 71.8, 55.9, 55.1, 49.5, 43.3, 42.8, 40.5, 40.4, 39.5, 38.4, 37.3, 34.2, 33.0, 31.8, 29.7, 28.1, 25.9, 22.9, 21.5, 21.1, 19.9, 19.6, 18.2, 17.6, 13.0, 12.0, -4.6; HRMS (ESI) calculated 513.4486 (M + H), observed 513.4485.

*Synthesis of aldehyde 8.*  $\text{OsO}_4$  (~0.16 M/ $\text{H}_2\text{O}$ , 1.2 mL, 0.19 mmol) was added to a solution of **7** (0.51 g, 0.99 mmol) and NMO (0.13 g, 1.1 mmol) in a mixture of THF (8 mL) and *t*BuOH (3 mL). After 3 d, the reaction mixture was quenched with saturated  $\text{Na}_2\text{SO}_3$  and extracted with EtOAc. The organic layer was washed with brine and dried over  $\text{MgSO}_4$ . The product (0.23 g, 42%) was purified by column chromatography (20% EtOAc/hexanes). The product was isolated as a mixture of diastereomers.  $^1\text{H}$  NMR ( $\text{CDCl}_3$ )  $\delta$  5.11 (br s, 1H), 3.66-3.65 (m, 1H), 3.55-3.50 (m, 1.6 H), 3.34 (t, 0.4H,  $J = 5.5$  Hz), 2.42 (br s, 2H), 2.05-1.90 (m, 2H), 1.90-1.19 (m, 21H), 0.97 (d, 3H,  $J = 6.9$  Hz), 0.91 (d, 3H,  $J = 6.7$  Hz), 0.86-0.80 (m, 15H), 0.74 (s, 3H), 0.51 (s, 1.8H), 0.50 (s, 1.2H), 0.005 (s, 6H);  $^{13}\text{C}$  NMR ( $\text{CDCl}_3$ )  $\delta$  139.2 (minor), 139.0 (major), 117.8 (major), 117.7 (minor), 76.1, 73.1, 72.5, 71.8, 70.2, 54.8, 54.6, 52.6, 52.5, 49.4, 43.8, 43.2, 42.4, 41.5, 40.8, 40.3, 39.5, 38.4, 37.3, 34.1, 31.8, 31.5, 29.6, 27.8, 27.6, 26.9, 25.9, 23.1, 22.8, 22.1, 21.5, 21.0, 18.7, 18.2, 17.2, 14.1, 13.0, 12.6, 11.7, 11.6, 10.8, 9.9, -4.6; HRMS (ESI) calculated 547.4541 (M + H), observed 547.4513.

$\text{NaIO}_4$  (0.35 g, 1.6 mmol) was added to a solution of the diol (0.54 g, 0.99 mmol) in THF/pH 7 buffer (4 mL, 3:1). After 2 h, the reaction mixture was diluted with EtOAc and washed with  $\text{H}_2\text{O}$ , brine, and dried over  $\text{MgSO}_4$ . Purification by column chromatography (10% EtOAc/hexanes) afforded the product as a white powder (0.43 g, 99%).  $^1\text{H}$  NMR ( $\text{CDCl}_3$ )  $\delta$  9.55 (d, 1H,  $J = 6.0$  Hz), 5.15 (s, 1H), 3.57-3.48 (m, 1H), 2.39-2.33 (m, 1H), 1.96-1.54 (m, 12H), 1.48-1.22 (m, 8H), 1.10 (d, 3H,  $J = 6.9$  Hz), 0.85 (s, 9H), 0.76 (s, 3H), 0.55 (s, 3H), 0.022 (s, 6H);  $^{13}\text{C}$  NMR ( $\text{CDCl}_3$ )  $\delta$  205.0, 138.6, 118.2, 71.8, 54.2, 50.9, 49.8, 49.4, 43.9, 40.3, 39.2, 38.4, 37.3, 34.2, 31.8, 29.6, 26.7, 25.9, 23.3, 21.4, 18.2, 13.5, 13.0, 12.2, -4.6; HRMS (ESI) calculated 445.3496 (M + H), observed 445.3477.

*Synthesis of 4-(tert-butyldimethylsilyloxy)-1-bromo-3-butyne.* *n*BuLi (2.5 M/hexanes, 60 mL, 0.15 mol) was added to a solution of 3-butyne-1-ol (5.0 mL, 0.066 mol) in THF (160 mL) at 0 °C. After 30 min, a solution of TBSCl (23 g, 0.15 mol) in THF (10 mL) was added. The reaction was allowed to stir overnight, then quenched

with H<sub>2</sub>O and extracted with EtOAc. The crude product was dissolved in HOAc:H<sub>2</sub>O (160 mL, 2:1) and heated to 80 °C. After 1 h, the reaction mixture was cooled and extracted with toluene. The organic layer was washed with saturated NaHCO<sub>3</sub>, brine, and dried over MgSO<sub>4</sub>. The product was purified by column chromatography (20% EtOAc/hexanes) and isolated as a yellow liquid (7.4 g, 60%). <sup>1</sup>H NMR (CDCl<sub>3</sub>) δ 3.68 (t, 2H, J = 6.3 Hz), 2.47 (t, 2H, J = 6.4 Hz), 1.96 (br s, 1H), 0.89 (s, 9H), 0.06 (s, 6H); <sup>13</sup>C NMR (CDCl<sub>3</sub>) δ 103.8, 85.0, 60.9, 26.0, 25.6, 24.2, 17.9, 16.4, -3.7, -4.6.

NBS (8.6 g, 0.048 mol) was added in portions to a solution of the alcohol (7.4 g, 0.040 mol) and PPh<sub>3</sub> (13 g, 0.048 mol) in CH<sub>2</sub>Cl<sub>2</sub> (150 mL) at 0 °C. After 30 min, the reaction mixture was diluted with ether and filtered through a pad of silica. Purification by column chromatography (10% EtOAc/hexanes) afforded the product as a pale yellow liquid (5.9 g, 60%). <sup>1</sup>H NMR (CDCl<sub>3</sub>) δ 3.41 (t, 2H, J = 7.4 Hz), 2.76 (t, 2H, J = 7.4 Hz), 0.91 (s, 9H), 0.07 (s, 6H); <sup>13</sup>C NMR (CDCl<sub>3</sub>) δ 103.7, 85.2, 29.4, 26.0, 24.2, 16.4, -4.7.

*Synthesis of 9.* A solution of 4-(*tert*-butyldimethylsilyloxy)-1-bromo-3-butyne (2.2 g, 8.9 mmol) in THF (8 mL) was added dropwise to Mg turnings (1.1 g, 45 mmol) that had been vigorously stirred overnight. After 1 h, the Grignard reagent was added to a solution of the aldehyde **8** (1.3 g, 3.0 mmol) in THF (15 mL) at 0 °C. After 1 h, the reaction was quenched with saturated NH<sub>4</sub>Cl and extracted with EtOAc. The organic layer was washed with brine and dried over MgSO<sub>4</sub>. The product was purified by column chromatography (10% EtOAc/hexanes) and isolated as an off-white foam (1.1 g, 58%). <sup>1</sup>H NMR (CDCl<sub>3</sub>) δ 5.14 (br s, 1H), 3.86-3.83 (m, 1H), 3.57-3.47 (m, 1H), 2.32 (t, 2H, J = 7.0 Hz), 2.00-1.95 (m, 2H), 1.90-1.20 (m, 22H), 0.90 (s, 9H), 0.89 (d, 3H, J = 3.8 Hz), 0.86 (s, 9H), 0.76 (s, 3H), 0.52 (s, 3H), 0.05 (s, 6H), 0.03 (s, 6H); <sup>13</sup>C NMR (CDCl<sub>3</sub>) δ 139.3, 117.7, 107.4, 83.2, 72.6, 71.8, 54.9, 52.5, 49.4, 43.3, 40.9, 40.3, 39.5, 38.4, 37.3, 34.2, 34.1, 31.8, 29.7, 27.4, 26.0, 25.9, 22.8, 21.5, 18.2, 17.1, 16.4, 13.0, 11.9, 11.7, -4.5, -4.6; HRMS (ESI) calculated 613.4831 (M + H), observed 613.4841.

*Synthesis of 10.* MsCl (0.30 mL, 3.9 mmol) was added to a solution of **9** (1.2 g, 1.9 mmol) in anhydrous pyridine (10 mL). After 1 h, the reaction mixture was diluted with EtOAc and washed with H<sub>2</sub>O, brine, and dried over MgSO<sub>4</sub>. Purification by column chromatography (10% EtOAc/hexanes) afforded the product as a

white foam (1.2 g, 89%).  $^1\text{H}$  NMR ( $\text{CDCl}_3$ )  $\delta$  5.12 (br s, 1H), 4.90 (t, 1H,  $J = 6.8$  Hz), 3.53-3.47 (m, 1H), 2.98 (s, 3H), 2.28 (t, 2H,  $J = 6.8$  Hz), 2.15-1.92 (m, 3H), 1.82-1.21 (m, 20H), 0.95 (d, 3H,  $J = 6.0$  Hz), 0.88 (s, 9H), 0.84 (s, 9H), 0.74 (s, 3H), 0.51 (s, 3H), 0.04 (s, 6H), 0.004 (s, 6H);  $^{13}\text{C}$  NMR ( $\text{CDCl}_3$ )  $\delta$  138.9, 118.0, 105.4, 85.1, 84.2, 71.7, 54.8, 52.0, 49.4, 43.3, 40.2, 39.8, 39.4, 38.7, 38.4, 37.3, 34.1, 31.8, 31.2, 29.6, 27.6, 26.0, 25.9, 22.9, 21.4, 18.2, 16.6, 16.3, 13.1, 13.0, 11.7, -4.5, -4.6; HRMS (ESI) calculated  $m/z$  713.4426 (M + Na), observed  $m/z$  713.4401.

LAH (1M/THF, 5.0 mL, 5.0 mmol) was added to a solution of the mesylate (1.2 g, 1.7 mmol) in THF (9 mL), then heated to reflux. After 1 h, the reaction mixture was cooled and quenched cautiously with 10% HCl, then extracted with EtOAc. The organics were washed with brine and dried over  $\text{MgSO}_4$ . The product was isolated as a white powder (0.66 g, 65%) after purification by column chromatography (5% EtOAc/hexanes). Some elimination occurred and the products were inseparable. They were purified after deprotection.  $^1\text{H}$  NMR ( $\text{CDCl}_3$ )  $\delta$  5.13 (br s, 1H), 3.57-3.49 (m, 1H), 2.24-2.15 (m, 2H), 2.01-1.02 (m, 25H), 0.91 (d, 3H,  $J = 4.3$  Hz), 0.90 (s, 9H), 0.86 (s, 9H), 0.76 (s, 3H), 0.51 (s, 3H), 0.06 (s, 6H), 0.03 (s, 6H);  $^{13}\text{C}$  NMR ( $\text{CDCl}_3$ )  $\delta$  139.4, 117.5, 107.9, 82.3, 71.8, 55.9, 55.0, 49.6, 43.3, 40.4, 39.5, 38.4, 37.3, 36.7, 35.6, 34.9, 34.2, 31.8, 31.6, 29.7, 27.9, 26.1, 26.0, 24.5, 22.9, 21.5, 20.4, 18.8, 18.2, 16.5, 14.1, 13.0, 11.8, -4.5, -4.6; HRMS (ESI) calculated 597.4881 (M + H), observed 597.4885.

*Synthesis of a-Lath (II)*. TBAF (1M/THF, 3.3 mL, 3.3 mmol) was added to a solution of **10** (0.66 g, 1.1 mmol) in THF (5 mL). After stirring overnight, the reaction mixture was diluted with EtOAc and washed with  $\text{H}_2\text{O}$ , brine, and dried over  $\text{MgSO}_4$ . The product was purified by column chromatography (20% EtOAc/hexanes) and isolated as a white powder (0.31 g, 75%). Higher purity product was obtained by HPLC purification on a C18 column using  $\text{CH}_3\text{CN}:\text{MeOH}$  (70:30).  $^1\text{H}$  NMR ( $\text{CDCl}_3$ )  $\delta$  5.14 (d, 1H,  $J = 2.3$  Hz), 3.62-3.52 (m, 1H), 2.16-2.09 (m, 2H), 2.02-1.96 (m, 1H), 1.92 (t, 1H,  $J = 2.6$  Hz), 1.82-1.71 (m, 6H), 1.59-1.05 (m, 18H), 0.91 (d, 3H,  $J = 6.5$  Hz), 0.77 (s, 3H), 0.51 (s, 3H);  $^{13}\text{C}$  NMR ( $\text{CDCl}_3$ )  $\delta$  139.5, 117.5, 84.8, 71.0, 68.0, 55.9, 55.0, 49.4, 43.3, 40.2, 39.5, 37.9, 37.1, 35.7, 35.0, 34.1, 31.4, 29.6, 27.8, 25.1, 22.9, 21.5, 18.8, 13.0, 11.8; HRMS (ESI) calculated 351.3046 (M + H), observed 351.3044.

Figure S1. Structure of photo-cleavable azido biotin.

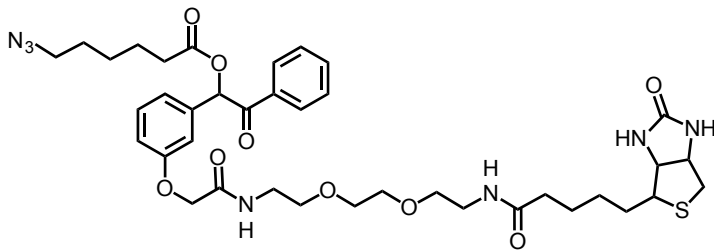

Figure S2. 3 Biological replica of (A) Streptavidin westerns after click reaction (B) short-stacking SDS Page stained with Simply blue after photo-release. Control (DMSO), 10  $\mu$ M of *a*-Lanosterol, and 5  $\mu$ M of *a*-7-DHC were treated in *Dhcr7*-deficient N2aCells for 24 h.

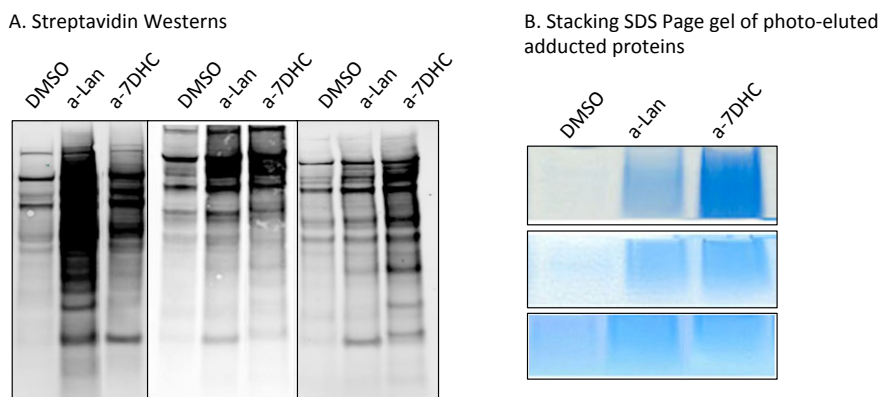

Table S1. Enrichment factors for the 423 proteins found common to the *a*-7-DHC and *a*-Lan experiments and the ranking of each protein based on enrichment.

|      | <i>a</i> -7-DHC | Enrichment Factors     |      | <i>a</i> -Lan | Enrichment Factors     |
|------|-----------------|------------------------|------|---------------|------------------------|
| Rank | Gene ID         | log2 (count1*/count2*) | Rank | Gene ID       | log2 (count1*/count2*) |
| 1    | Crmp1           | 2.12                   | 1    | Tnpo1         | 2.03                   |
| 2    | Atp5a1          | 2.14                   | 2    | Psm2          | 2.04                   |
| 3    | Vdac2           | 2.15                   | 3    | Mcm7          | 2.07                   |
| 4    | Gnao1           | 2.17                   | 4    | Vdac2         | 2.08                   |
| 5    | Ncapg           | 2.22                   | 5    | Mtap1b        | 2.09                   |
| 6    | Tm9sf2          | 2.32                   | 6    | Cct4          | 2.09                   |
| 7    | Tubgcp3         | 2.32                   | 7    | Immt          | 2.09                   |
| 8    | Srrt            | 2.32                   | 8    | Iars          | 2.10                   |
| 9    | Slc16a6         | 2.32                   | 9    | Atp5a1        | 2.10                   |
| 10   | Nup133          | 2.32                   | 10   | Rps16         | 2.12                   |
| 11   | Nop56           | 2.32                   | 11   | Cct2          | 2.14                   |
| 12   | Birc6           | 2.32                   | 12   | Eef1d         | 2.17                   |
| 13   | Hspa14          | 2.32                   | 13   | Eif3i         | 2.17                   |
| 14   | Lmna            | 2.32                   | 14   | Fads2         | 2.17                   |
| 15   | Mcm7            | 2.32                   | 15   | Hist1h2bc     | 2.17                   |
| 16   | Ndufs1          | 2.32                   | 16   | Nap111        | 2.17                   |



|    |           |      |    |               |      |
|----|-----------|------|----|---------------|------|
| 17 | Nisch     | 2.32 | 17 | Rps20         | 2.17 |
| 18 | Akap9     | 2.32 | 18 | Hspa4         | 2.20 |
| 19 | Bub3      | 2.46 | 19 | Tars          | 2.22 |
| 20 | Immt      | 2.52 | 20 | Rpl7          | 2.22 |
| 21 | Myh10     | 2.53 | 21 | Ncapg         | 2.22 |
| 22 | Hnrnpf    | 2.54 | 22 | Fkbp4         | 2.22 |
| 23 | Prdx4     | 2.54 | 23 | Eif3e         | 2.22 |
| 24 | Psm2      | 2.56 | 24 | Ahsa1         | 2.22 |
| 25 | Slc1a5    | 2.56 | 25 | Slc1a5        | 2.24 |
| 26 | Tmtc3     | 2.58 | 26 | Atp2a1        | 2.25 |
| 27 | Ube4a     | 2.58 | 27 | Gdi1          | 2.25 |
| 28 | Usp10     | 2.58 | 28 | Rcc2          | 2.25 |
| 29 | Vps26b    | 2.58 | 29 | Rps2          | 2.25 |
| 30 | Timm50    | 2.58 | 30 | Eif3b         | 2.29 |
| 31 | Spes2     | 2.58 | 31 | Myh10         | 2.30 |
| 32 | Abcd3     | 2.58 | 32 | Prdx4         | 2.32 |
| 33 | Chordc1   | 2.58 | 33 | Prdx6         | 2.32 |
| 34 | Eef1d     | 2.58 | 34 | Rad21         | 2.32 |
| 35 | Ephx1     | 2.58 | 35 | Rpl19         | 2.32 |
| 36 | Etf1      | 2.58 | 36 | Rpl21         | 2.32 |
| 37 | Fads2     | 2.58 | 37 | Serinc1       | 2.32 |
| 38 | Gps1      | 2.58 | 38 | Slc16a6       | 2.32 |
| 39 | Hba-a1    | 2.58 | 39 | Slc1a4        | 2.32 |
| 40 | Hist1h2bc | 2.58 | 40 | Smc1a         | 2.32 |
| 41 | Iars      | 2.58 | 41 | Srrt          | 2.32 |
| 42 | Kif11     | 2.58 | 42 | Timm44        | 2.32 |
| 43 | Lss       | 2.58 | 43 | Tm9sf2        | 2.32 |
| 44 | Msh6      | 2.58 | 44 | Tm9sf3        | 2.32 |
| 45 | Ret       | 2.58 | 45 | Tubgcp3       | 2.32 |
| 46 | Rif1      | 2.58 | 46 | Ube4a         | 2.32 |
| 47 | Rps16     | 2.58 | 47 | Uchl1         | 2.32 |
| 48 | Slc1a4    | 2.58 | 48 | Zmpste24      | 2.32 |
| 49 | Cad       | 2.70 | 49 | Pded6ip       | 2.32 |
| 50 | Cct2      | 2.70 | 50 | Nup188        | 2.32 |
| 51 | Rps20     | 2.70 | 51 | Oat           | 2.32 |
| 52 | Atp2a1    | 2.73 | 52 | Nisch         | 2.32 |
| 53 | Ahsa1     | 2.74 | 53 | Ncdn          | 2.32 |
| 54 | Trim28    | 2.74 | 54 | Nceh1         | 2.32 |
| 55 | Pgd       | 2.77 | 55 | Myo5a         | 2.32 |
| 56 | Dhx9      | 2.77 | 56 | Msh2          | 2.32 |
| 57 | Rpl7      | 2.77 | 57 | Luc7l2        | 2.32 |
| 58 | Atp2a2    | 2.78 | 58 | Ipo4          | 2.32 |
| 59 | Cct4      | 2.78 | 59 | Kcmf1         | 2.32 |
| 60 | Tnpo1     | 2.79 | 60 | Hnrnpf        | 2.32 |
| 61 | Cend1     | 2.81 | 61 | 4930572J05Rik | 2.32 |

|     |                   |      |     |          |      |
|-----|-------------------|------|-----|----------|------|
| 62  | Cpsf2             | 2.81 | 62  | Abcd3    | 2.32 |
| 63  | Elov15            | 2.81 | 63  | Actr3    | 2.32 |
| 64  | Fam134c           | 2.81 | 64  | Aimp2    | 2.32 |
| 65  | Fam38a            | 2.81 | 65  | Atp5f1   | 2.32 |
| 66  | Glt25d1           | 2.81 | 66  | Bag3     | 2.32 |
| 67  | Hsd17b4           | 2.81 | 67  | BC055324 | 2.32 |
| 68  | Myo1c             | 2.81 | 68  | Birc6    | 2.32 |
| 69  | Ncln              | 2.81 | 69  | Btaf1    | 2.32 |
| 70  | Nlrp4e            | 2.81 | 70  | Capn2    | 2.32 |
| 71  | Nudcd1            | 2.81 | 71  | Cd151    | 2.32 |
| 72  | Pgk1              | 2.81 | 72  | Cd47     | 2.32 |
| 73  | Psmb6             | 2.81 | 73  | Cdc42    | 2.32 |
| 74  | Rab3gap2          | 2.81 | 74  | Cyb5r3   | 2.32 |
| 75  | Rad21             | 2.81 | 75  | Der11    | 2.32 |
| 76  | Rpl10             | 2.81 | 76  | Dnaja1   | 2.32 |
| 77  | Rpl26             | 2.81 | 77  | Ephx1    | 2.32 |
| 78  | Thoc2             | 2.81 | 78  | Fam38a   | 2.32 |
| 79  | Tram1             | 2.81 | 79  | Fkbp8    | 2.32 |
| 80  | Tti1              | 2.81 | 80  | Gps1     | 2.32 |
| 81  | Umps              | 2.81 | 81  | Gstp1    | 2.32 |
| 82  | Urb1              | 2.81 | 82  | Hba-a1   | 2.32 |
| 83  | Cd47              | 2.81 | 83  | Bcap31   | 2.37 |
| 84  | 4930572J<br>05Rik | 2.81 | 84  | Iqgap1   | 2.38 |
| 85  | At13              | 2.81 | 85  | Pgd      | 2.38 |
| 86  | Eif3b             | 2.85 | 86  | Flnc     | 2.39 |
| 87  | Tufm              | 2.91 | 87  | Tkt      | 2.43 |
| 88  | Rpl28             | 2.91 | 88  | Flna     | 2.44 |
| 89  | Rcc2              | 2.91 | 89  | Dhx9     | 2.45 |
| 90  | Hspa4             | 2.91 | 90  | Tufm     | 2.46 |
| 91  | Atp1a1            | 2.94 | 91  | Rpl28    | 2.46 |
| 92  | Smc1a             | 3.00 | 92  | Cct5     | 2.46 |
| 93  | Sun1              | 3.00 | 93  | Lrrc59   | 2.46 |
| 94  | Tm9sf3            | 3.00 | 94  | Matr3    | 2.46 |
| 95  | Tomm70a           | 3.00 | 95  | Rpl10    | 2.46 |
| 96  | Slc29a1           | 3.00 | 96  | Atp2a2   | 2.48 |
| 97  | Rps2              | 3.00 | 97  | Crmp1    | 2.50 |
| 98  | Rpl21             | 3.00 | 98  | Sars     | 2.52 |
| 99  | Aldh9a1           | 3.00 | 99  | Slc2a3   | 2.58 |
| 100 | Atp5c1            | 3.00 | 100 | Smarca4  | 2.58 |
| 101 | Btaf1             | 3.00 | 101 | Spes2    | 2.58 |
| 102 | Cyb5r3            | 3.00 | 102 | Supt16h  | 2.58 |
| 103 | Gnas              | 3.00 | 103 | Tex10    | 2.58 |
| 104 | Med23             | 3.00 | 104 | Thoc2    | 2.58 |
| 105 | Prkaa1            | 3.00 | 105 | Timm50   | 2.58 |
| 106 | Prkaca            | 3.00 | 106 | Tmtc3    | 2.58 |

|     |                   |      |     |               |      |
|-----|-------------------|------|-----|---------------|------|
| 107 | Prkacb            | 3.00 | 107 | Tomm70a       | 2.58 |
| 108 | Rpl10a            | 3.00 | 108 | Vps26b        | 2.58 |
| 109 | Flna              | 3.01 | 109 | Slc16a3       | 2.58 |
| 110 | Cct5              | 3.04 | 110 | Scarb2        | 2.58 |
| 111 | Fkbp4             | 3.06 | 111 | Rpsa          | 2.58 |
| 112 | Tars              | 3.06 | 112 | Rsl1d1        | 2.58 |
| 113 | Gnb2l1            | 3.07 | 113 | Ret           | 2.58 |
| 114 | Ap1g1             | 3.09 | 114 | Pgk1          | 2.58 |
| 115 | Dnmt1             | 3.09 | 115 | Prkaa1        | 2.58 |
| 116 | Gdi1              | 3.09 | 116 | Prkaca        | 2.58 |
| 117 | Lrrc59            | 3.09 | 117 | Prkacb        | 2.58 |
| 118 | Nap1l1            | 3.09 | 118 | Psmb6         | 2.58 |
| 119 | Tpr               | 3.09 | 119 | Psmc4         | 2.58 |
| 120 | Tkt               | 3.10 | 120 | Paics         | 2.58 |
| 121 | Eif3e             | 3.12 | 121 | Pafah1b1      | 2.58 |
| 122 | Xpo1              | 3.14 | 122 | Nup107        | 2.58 |
| 123 | 13000011<br>01Rik | 3.17 | 123 | Bub3          | 2.58 |
| 124 | Actr3             | 3.17 | 124 | Cacybp        | 2.58 |
| 125 | Atad3a            | 3.17 | 125 | Chordc1       | 2.58 |
| 126 | Bcap31            | 3.17 | 126 | Cul7          | 2.58 |
| 127 | Cd151             | 3.17 | 127 | D10Wsu52<br>e | 2.58 |
| 128 | Dpysl2            | 3.17 | 128 | Dync1i2       | 2.58 |
| 129 | Eif3m             | 3.17 | 129 | Eftud2        | 2.58 |
| 130 | Emc1              | 3.17 | 130 | Eif3m         | 2.58 |
| 131 | Fkbp8             | 3.17 | 131 | Esyt1         | 2.58 |
| 132 | Lap3              | 3.17 | 132 | Esyt2         | 2.58 |
| 133 | Lmf2              | 3.17 | 133 | Gaa           | 2.58 |
| 134 | Lpeat3            | 3.17 | 134 | Gls           | 2.58 |
| 135 | Nbas              | 3.17 | 135 | Glt25d1       | 2.58 |
| 136 | Nmt1              | 3.17 | 136 | Gnai2         | 2.58 |
| 137 | Nup107            | 3.17 | 137 | Gnao1         | 2.58 |
| 138 | Pelp1             | 3.17 | 138 | Gnas          | 2.58 |
| 139 | Pfkl              | 3.17 | 139 | Hdlbp         | 2.58 |
| 140 | Pfn1              | 3.17 | 140 | Heatr6        | 2.58 |
| 141 | Psmd12            | 3.17 | 141 | Hspa14        | 2.58 |
| 142 | Rnh1              | 3.17 | 142 | Lss           | 2.58 |
| 143 | Rps18             | 3.17 | 143 | Mat2a         | 2.58 |
| 144 | Rpsa              | 3.17 | 144 | Me1           | 2.58 |
| 145 | Rsl1d1            | 3.17 | 145 | Metap2        | 2.58 |
| 146 | Slc16a3           | 3.17 | 146 | Msh6          | 2.58 |
| 147 | Slc2a3            | 3.17 | 147 | Myadm         | 2.58 |
| 148 | Syne2             | 3.17 | 148 | Ndufs1        | 2.58 |
| 149 | Tex10             | 3.17 | 149 | Nudcd1        | 2.58 |
| 150 | Flnc              | 3.19 | 150 | At13          | 2.58 |

|     |         |      |     |         |      |
|-----|---------|------|-----|---------|------|
| 151 | Ipo5    | 3.26 | 151 | Ap1g1   | 2.58 |
| 152 | Tnpo2   | 3.26 | 152 | Cct7    | 2.62 |
| 153 | Vdac3   | 3.29 | 153 | Cad     | 2.64 |
| 154 | Serinc1 | 3.32 | 154 | Pfkl    | 2.66 |
| 155 | Smarca4 | 3.32 | 155 | Trim28  | 2.66 |
| 156 | Ppp2r2a | 3.32 | 156 | Dnmt1   | 2.70 |
| 157 | Rpl36   | 3.32 | 157 | Lmf2    | 2.70 |
| 158 | Ruvbl2  | 3.32 | 158 | Sept7   | 2.70 |
| 159 | Oat     | 3.32 | 159 | Atp1a1  | 2.72 |
| 160 | Polr2b  | 3.32 | 160 | Eprs    | 2.72 |
| 161 | Myadm   | 3.32 | 161 | Hnrnpa1 | 2.75 |
| 162 | Ncdn    | 3.32 | 162 | Kpnb1   | 2.75 |
| 163 | Msh2    | 3.32 | 163 | Mybbp1a | 2.76 |
| 164 | Luc7l2  | 3.32 | 164 | Gnb2l1  | 2.77 |
| 165 | Armc6   | 3.32 | 165 | Tmx3    | 2.81 |
| 166 | Atad1   | 3.32 | 166 | Top2a   | 2.81 |
| 167 | Bag3    | 3.32 | 167 | Tram1   | 2.81 |
| 168 | Cse1l   | 3.32 | 168 | Tti1    | 2.81 |
| 169 | Cul4a   | 3.32 | 169 | Ube4b   | 2.81 |
| 170 | Dync1i2 | 3.32 | 170 | Urb1    | 2.81 |
| 171 | Fads1   | 3.32 | 171 | Usp10   | 2.81 |
| 172 | Gstp1   | 3.32 | 172 | Vcl     | 2.81 |
| 173 | Kcmf1   | 3.32 | 173 | Vps13c  | 2.81 |
| 174 | Spnb2   | 3.36 | 174 | Slc29a1 | 2.81 |
| 175 | Cct7    | 3.36 | 175 | Rps18   | 2.81 |
| 176 | Kpnb1   | 3.37 | 176 | Rpl9    | 2.81 |
| 177 | Agpat4  | 3.46 | 177 | Armc6   | 2.81 |
| 178 | Ap3d1   | 3.46 | 178 | Arpc1b  | 2.81 |
| 179 | Arpc1b  | 3.46 | 179 | Atad3a  | 2.81 |
| 180 | Bzw1    | 3.46 | 180 | Atp5c1  | 2.81 |
| 181 | Derl1   | 3.46 | 181 | Cend1   | 2.81 |
| 182 | Eif3i   | 3.46 | 182 | Elov15  | 2.81 |
| 183 | Ermp1   | 3.46 | 183 | Fads1   | 2.81 |
| 184 | Hdlbp   | 3.46 | 184 | Fam134c | 2.81 |
| 185 | Hnrnpa1 | 3.46 | 185 | Heatr5b | 2.81 |
| 186 | Idh3a   | 3.46 | 186 | Idh3a   | 2.81 |
| 187 | Ints3   | 3.46 | 187 | Kdelr2  | 2.81 |
| 188 | Kdelr2  | 3.46 | 188 | Ktn1    | 2.81 |
| 189 | Ktn1    | 3.46 | 189 | Lap3    | 2.81 |
| 190 | Lass2   | 3.46 | 190 | Lass2   | 2.81 |
| 191 | Mat2a   | 3.46 | 191 | Lmna    | 2.81 |
| 192 | Mcm3    | 3.46 | 192 | Lmnb1   | 2.81 |
| 193 | Mms19   | 3.46 | 193 | Nmt1    | 2.81 |
| 194 | Mtap1b  | 3.46 | 194 | Nup85   | 2.81 |
| 195 | Myo1b   | 3.46 | 195 | Oxct1   | 2.81 |

|     |          |      |     |          |      |
|-----|----------|------|-----|----------|------|
| 196 | Numa1    | 3.46 | 196 | Ppp2r2a  | 2.81 |
| 197 | Psmc5    | 3.46 | 197 | Psmc12   | 2.81 |
| 198 | Pycr2    | 3.46 | 198 | Ptbp1    | 2.81 |
| 199 | Rap1a    | 3.46 | 199 | Pycr2    | 2.81 |
| 200 | Rpl19    | 3.46 | 200 | Rap1a    | 2.81 |
| 201 | Slc38a1  | 3.46 | 201 | Rpl36    | 2.81 |
| 202 | Gnai3    | 3.52 | 202 | Abhd12   | 2.81 |
| 203 | Mcm2     | 3.52 | 203 | Agpat4   | 2.81 |
| 204 | Sept7    | 3.52 | 204 | Ap3d1    | 2.81 |
| 205 | Eprs     | 3.54 | 205 | Abcb6    | 2.81 |
| 206 | Zmpste24 | 3.58 | 206 | Cand1    | 2.85 |
| 207 | Vps13c   | 3.58 | 207 | Ipo5     | 2.87 |
| 208 | Unc45a   | 3.58 | 208 | Ddx21    | 2.87 |
| 209 | Psat1    | 3.58 | 209 | Psat1    | 2.91 |
| 210 | Skiv2l2  | 3.58 | 210 | Rpl26    | 2.91 |
| 211 | Smc4     | 3.58 | 211 | Vdac3    | 2.91 |
| 212 | BC055324 | 3.58 | 212 | Nop56    | 3.00 |
| 213 | Gnai2    | 3.58 | 213 | Nup133   | 3.00 |
| 214 | Heatr2   | 3.58 | 214 | Pfas     | 3.00 |
| 215 | Lmnb1    | 3.58 | 215 | Rab3gap2 | 3.00 |
| 216 | Lnpep    | 3.58 | 216 | Ruvbl2   | 3.00 |
| 217 | Metap2   | 3.58 | 217 | Slc7a1   | 3.00 |
| 218 | Naa25    | 3.58 | 218 | Suclg2   | 3.00 |
| 219 | Nceh1    | 3.58 | 219 | Umps     | 3.00 |
| 220 | Pcdcd6ip | 3.58 | 220 | Wdr1     | 3.00 |
| 221 | Pds5b    | 3.58 | 221 | Xpo7     | 3.00 |
| 222 | Gdi2     | 3.62 | 222 | Nlrp4e   | 3.00 |
| 223 | Mybbp1a  | 3.66 | 223 | Ncam1    | 3.00 |
| 224 | Cand1    | 3.68 | 224 | Myo1c    | 3.00 |
| 225 | Slc3a2   | 3.68 | 225 | Mms19    | 3.00 |
| 226 | Iqgap1   | 3.70 | 226 | Akap9    | 3.00 |
| 227 | Matr3    | 3.70 | 227 | Atad1    | 3.00 |
| 228 | Mif      | 3.70 | 228 | Bzw1     | 3.00 |
| 229 | Nomo1    | 3.70 | 229 | Cisd1    | 3.00 |
| 230 | Rdh11    | 3.70 | 230 | Clptm1   | 3.00 |
| 231 | Slc25a12 | 3.70 | 231 | Dcahd    | 3.00 |
| 232 | Slc25a33 | 3.70 | 232 | Emc1     | 3.00 |
| 233 | Suclg2   | 3.70 | 233 | Etf1     | 3.00 |
| 234 | Supt16h  | 3.70 | 234 | Heatr2   | 3.00 |
| 235 | Timm44   | 3.70 | 235 | Itgb1    | 3.00 |
| 236 | Uchl1    | 3.70 | 236 | Lpcat3   | 3.00 |
| 237 | Vel      | 3.70 | 237 | Mcm2     | 3.00 |
| 238 | Heatr5b  | 3.70 | 238 | Tnpo2    | 3.04 |
| 239 | Ddx21    | 3.70 | 239 | Xpo1     | 3.05 |
| 240 | Copa     | 3.70 | 240 | Gnai3    | 3.09 |

|     |          |      |     |                   |      |
|-----|----------|------|-----|-------------------|------|
| 241 | Atm      | 3.70 | 241 | Gdi2              | 3.12 |
| 242 | Atp5f1   | 3.70 | 242 | Gemin5            | 3.12 |
| 243 | Abcb6    | 3.70 | 243 | Slc25a12          | 3.17 |
| 244 | Aimp2    | 3.70 | 244 | Soat1             | 3.17 |
| 245 | Lbr      | 3.75 | 245 | Skiv2l2           | 3.17 |
| 246 | Nup205   | 3.79 | 246 | Sec63             | 3.17 |
| 247 | Abhd12   | 3.81 | 247 | Cul4a             | 3.17 |
| 248 | Atp6v1a  | 3.81 | 248 | Dnaja2            | 3.17 |
| 249 | Capn2    | 3.81 | 249 | Enpp3             | 3.17 |
| 250 | Cul2     | 3.81 | 250 | Ermp1             | 3.17 |
| 251 | Esyt2    | 3.81 | 251 | Gbf1              | 3.17 |
| 252 | Gls      | 3.81 | 252 | Hsd17b4           | 3.17 |
| 253 | Heatr6   | 3.81 | 253 | Idh3g             | 3.17 |
| 254 | Me1      | 3.81 | 254 | Lnpep             | 3.17 |
| 255 | Nup188   | 3.81 | 255 | Mcm3              | 3.17 |
| 256 | Pafah1b1 | 3.81 | 256 | Mcm5              | 3.17 |
| 257 | Prdx6    | 3.81 | 257 | Mif               | 3.17 |
| 258 | Psmc4    | 3.81 | 258 | Ncln              | 3.17 |
| 259 | Rhot1    | 3.81 | 259 | Pds5b             | 3.17 |
| 260 | Sars     | 3.81 | 260 | Pelp1             | 3.17 |
| 261 | Soat1    | 3.81 | 261 | Rangap1           | 3.17 |
| 262 | Stt3b    | 3.81 | 262 | Rdh11             | 3.17 |
| 263 | Tbc1d15  | 3.81 | 263 | Rif1              | 3.17 |
| 264 | Top2a    | 3.81 | 264 | Rpl10a            | 3.17 |
| 265 | Urb2     | 3.81 | 265 | Rrp12             | 3.17 |
| 266 | Ipo7     | 3.83 | 266 | Cul2              | 3.17 |
| 267 | Mcm5     | 3.86 | 267 | Aldh9a1           | 3.17 |
| 268 | Rpl7a    | 3.86 | 268 | Cpsf2             | 3.17 |
| 269 | Abcf2    | 3.86 | 269 | Ipo7              | 3.21 |
| 270 | Gemin5   | 3.87 | 270 | Yars              | 3.25 |
| 271 | Srsf6    | 3.91 | 271 | Smc4              | 3.25 |
| 272 | Tmx3     | 3.91 | 272 | Tpr               | 3.25 |
| 273 | Rrp12    | 3.91 | 273 | Atic              | 3.27 |
| 274 | Ptbp1    | 3.91 | 274 | Nup205            | 3.29 |
| 275 | Psmc6    | 3.91 | 275 | Cse11             | 3.30 |
| 276 | Pfas     | 3.91 | 276 | Slc3a2            | 3.30 |
| 277 | Cdc42    | 3.91 | 277 | Lbr               | 3.32 |
| 278 | Deakd    | 3.91 | 278 | Polr2b            | 3.32 |
| 279 | Idh3g    | 3.91 | 279 | Rhot1             | 3.32 |
| 280 | Kif5b    | 3.91 | 280 | Rpl7a             | 3.32 |
| 281 | Nup160   | 3.91 | 281 | Snrnp200          | 3.32 |
| 282 | Nup85    | 3.91 | 282 | Unc45a            | 3.32 |
| 283 | Atic     | 3.97 | 283 | Ints3             | 3.32 |
| 284 | Dnaja2   | 4.00 | 284 | 1300001101<br>Rik | 3.32 |
| 285 | Drg2     | 4.00 | 285 | Atm               | 3.32 |

|     |               |      |     |          |      |
|-----|---------------|------|-----|----------|------|
| 286 | Ipo4          | 4.00 | 286 | Atp6v1h  | 3.32 |
| 287 | Myo5a         | 4.00 | 287 | Copa     | 3.32 |
| 288 | Ncam1         | 4.00 | 288 | Dpysl2   | 3.32 |
| 289 | Tmem97        | 4.00 | 289 | Eif2s3x  | 3.32 |
| 290 | Vps18         | 4.00 | 290 | Gart     | 3.32 |
| 291 | Cisd1         | 4.00 | 291 | Tbc1d15  | 3.46 |
| 292 | Snmp200       | 4.07 | 292 | Sun1     | 3.46 |
| 293 | Cul7          | 4.09 | 293 | Myo1b    | 3.46 |
| 294 | D10Wsu5<br>2e | 4.09 | 294 | Nbas     | 3.46 |
| 295 | Eftud2        | 4.09 | 295 | Nomo1    | 3.46 |
| 296 | Gaa           | 4.09 | 296 | Pfn1     | 3.46 |
| 297 | Gspt1         | 4.09 | 297 | Psmc5    | 3.46 |
| 298 | Gtpbp4        | 4.09 | 298 | Psmc6    | 3.46 |
| 299 | Oxct1         | 4.09 | 299 | Rpl13a   | 3.46 |
| 300 | Ruvbl1        | 4.09 | 300 | Slc25a33 | 3.46 |
| 301 | Ube4b         | 4.09 | 301 | Slc38a1  | 3.46 |
| 302 | Yars          | 4.09 | 302 | Srsf6    | 3.46 |
| 303 | Nipbl         | 4.17 | 303 | Acat1    | 3.46 |
| 304 | Nsdhl         | 4.17 | 304 | Atp6v1a  | 3.46 |
| 305 | Paics         | 4.17 | 305 | Ctps     | 3.46 |
| 306 | Tbcd          | 4.17 | 306 | Gm17296  | 3.46 |
| 307 | Ube3c         | 4.17 | 307 | H13      | 3.46 |
| 308 | Xpo7          | 4.17 | 308 | Med23    | 3.46 |
| 309 | Idh3b         | 4.17 | 309 | Abcf2    | 3.52 |
| 310 | Lass5         | 4.17 | 310 | Bzw2     | 3.52 |
| 311 | Atp6v1h       | 4.17 | 311 | Stt3b    | 3.58 |
| 312 | Fanci         | 4.17 | 312 | Syne2    | 3.58 |
| 313 | Gbf1          | 4.17 | 313 | Tmem97   | 3.58 |
| 314 | Gfpt1         | 4.17 | 314 | Ube3c    | 3.58 |
| 315 | Dync1h1       | 4.20 | 315 | Spnb2    | 3.58 |
| 316 | Bzw2          | 4.25 | 316 | Naa25    | 3.58 |
| 317 | Lonp1         | 4.25 | 317 | Nipbl    | 3.58 |
| 318 | Nup155        | 4.25 | 318 | Pgam1    | 3.58 |
| 319 | Pgam1         | 4.25 | 319 | Rnh1     | 3.58 |
| 320 | Tmem214       | 4.25 | 320 | Rtn4     | 3.58 |
| 321 | Slc7a1        | 4.32 | 321 | Gmps     | 3.58 |
| 322 | Wdr1          | 4.32 | 322 | Hadha    | 3.58 |
| 323 | Zw10          | 4.32 | 323 | Kif5b    | 3.58 |
| 324 | Sept9         | 4.32 | 324 | Nsdhl    | 3.64 |
| 325 | Acat1         | 4.32 | 325 | Ruvbl1   | 3.70 |
| 326 | Adpgk         | 4.32 | 326 | Sept2    | 3.70 |
| 327 | Ctps          | 4.32 | 327 | Sept9    | 3.70 |
| 328 | Ints1         | 4.32 | 328 | Vac14    | 3.70 |
| 329 | Ptplad1       | 4.32 | 329 | Vps18    | 3.70 |
| 330 | Xpo5          | 4.38 | 330 | Ptplad1  | 3.70 |

|     |                   |      |     |         |      |
|-----|-------------------|------|-----|---------|------|
| 331 | Gm17296           | 4.39 | 331 | Acs13   | 3.70 |
| 332 | Gm364             | 4.39 | 332 | Akap12  | 3.70 |
| 333 | Kntc1             | 4.39 | 333 | Gdpd1   | 3.70 |
| 334 | Rpl13a            | 4.39 | 334 | Gfpt1   | 3.70 |
| 335 | Stt3a             | 4.39 | 335 | Nup160  | 3.70 |
| 336 | Dctn1             | 4.39 | 336 | Dync1h1 | 3.72 |
| 337 | Sept2             | 4.46 | 337 | Lonp1   | 3.75 |
| 338 | Clptm1            | 4.46 | 338 | Cand2   | 3.81 |
| 339 | Cyb5b             | 4.46 | 339 | Fanci   | 3.81 |
| 340 | Dnaja1            | 4.46 | 340 | Gspt1   | 3.81 |
| 341 | Rangap1           | 4.46 | 341 | Kif11   | 3.81 |
| 342 | Sec63             | 4.46 | 342 | Urb2    | 3.81 |
| 343 | Vac14             | 4.52 | 343 | Adpgk   | 3.81 |
| 344 | Esyt1             | 4.52 | 344 | Cyb5b   | 3.91 |
| 345 | Itgb1             | 4.52 | 345 | Lass5   | 3.91 |
| 346 | Nup93             | 4.52 | 346 | Surf4   | 3.91 |
| 347 | Atp13a1           | 4.52 | 347 | Srprb   | 4.00 |
| 348 | Coro1c            | 4.52 | 348 | Tbcd    | 4.00 |
| 349 | Cacybp            | 4.58 | 349 | Dctn1   | 4.00 |
| 350 | Gdpd1             | 4.58 | 350 | Etfa    | 4.00 |
| 351 | Gmps              | 4.58 | 351 | Ncapd2  | 4.00 |
| 352 | Sgpl1             | 4.58 | 352 | Sec31a  | 4.00 |
| 353 | Sec31a            | 4.64 | 353 | Atp2b1  | 4.00 |
| 354 | Far1              | 4.64 | 354 | Sf3b1   | 4.04 |
| 355 | Arfgef2           | 4.64 | 355 | Stt3a   | 4.06 |
| 356 | Xpot              | 4.68 | 356 | Xpo5    | 4.08 |
| 357 | Cyfp1             | 4.70 | 357 | Huwe1   | 4.09 |
| 358 | Eif3h             | 4.70 | 358 | Ncapd3  | 4.09 |
| 359 | Enpp3             | 4.70 | 359 | Tmem214 | 4.09 |
| 360 | H13               | 4.70 | 360 | Utp20   | 4.09 |
| 361 | Srprb             | 4.70 | 361 | Zw10    | 4.09 |
| 362 | Ipo11             | 4.75 | 362 | Eif3h   | 4.09 |
| 363 | Scarb2            | 4.75 | 363 | Gtpbp4  | 4.09 |
| 364 | Eif2s3x           | 4.75 | 364 | Sgpl1   | 4.17 |
| 365 | Copg2             | 4.81 | 365 | Atp13a1 | 4.17 |
| 366 | Etfa              | 4.81 | 366 | Chd4    | 4.17 |
| 367 | Heatr1            | 4.81 | 367 | Idh3b   | 4.17 |
| 368 | Rtn4              | 4.81 | 368 | Mest    | 4.17 |
| 369 | Akap12            | 4.81 | 369 | Far1    | 4.25 |
| 370 | C330027<br>C09Rik | 4.81 | 370 | Ipo11   | 4.25 |
| 371 | Cand2             | 4.81 | 371 | Numa1   | 4.25 |
| 372 | Sf3b1             | 4.83 | 372 | Coro1c  | 4.25 |
| 373 | Chd4              | 4.86 | 373 | Usp9x   | 4.32 |
| 374 | Surf4             | 4.86 | 374 | Xpot    | 4.32 |
| 375 | Ap1b1             | 4.91 | 375 | Nup93   | 4.32 |



|     |          |      |     |               |      |
|-----|----------|------|-----|---------------|------|
| 376 | Ncapd3   | 4.91 | 376 | Rpn2          | 4.32 |
| 377 | Pds5a    | 4.95 | 377 | Cyp51         | 4.32 |
| 378 | Rpl9     | 4.95 | 378 | Ipo9          | 4.32 |
| 379 | Mtch2    | 4.95 | 379 | Gm364         | 4.36 |
| 380 | Gart     | 4.95 | 380 | Ints1         | 4.39 |
| 381 | Ggt7     | 4.95 | 381 | Nup155        | 4.39 |
| 382 | Cyp51    | 5.00 | 382 | Ckap4         | 4.39 |
| 383 | Ckap4    | 5.00 | 383 | Mthfd1        | 4.52 |
| 384 | Ctage5   | 5.00 | 384 | Trrap         | 4.52 |
| 385 | Atp2b1   | 5.04 | 385 | Drg2          | 4.52 |
| 386 | Rpn2     | 5.09 | 386 | Copg2         | 4.52 |
| 387 | Mtor     | 5.09 | 387 | Pds5a         | 4.58 |
| 388 | Acsl3    | 5.13 | 388 | Arfgef2       | 4.58 |
| 389 | Mest     | 5.13 | 389 | Hsd17b12      | 4.58 |
| 390 | Mon2     | 5.17 | 390 | Ap2b1         | 4.58 |
| 391 | Ap2b1    | 5.17 | 391 | Mtch2         | 4.64 |
| 392 | Ltn1     | 5.25 | 392 | Ggt7          | 4.64 |
| 393 | Ncapd2   | 5.29 | 393 | Cyfip1        | 4.64 |
| 394 | Ipo9     | 5.32 | 394 | Aldh112       | 4.64 |
| 395 | Hadha    | 5.32 | 395 | Tpp2          | 4.75 |
| 396 | Huwe1    | 5.36 | 396 | Kpna2         | 4.75 |
| 397 | Mthfd1   | 5.36 | 397 | Ltn1          | 4.75 |
| 398 | Tnpo3    | 5.43 | 398 | Heatr1        | 4.75 |
| 399 | Plec     | 5.43 | 399 | Tfrc          | 4.78 |
| 400 | Eif3a    | 5.43 | 400 | Mtor          | 4.81 |
| 401 | Tpp2     | 5.46 | 401 | Copb1         | 4.81 |
| 402 | Tfrc     | 5.48 | 402 | Ckap5         | 4.81 |
| 403 | Abce1    | 5.49 | 403 | Ap1b1         | 4.81 |
| 404 | Utp20    | 5.52 | 404 | Acsl4         | 4.86 |
| 405 | Trrap    | 5.52 | 405 | Tnpo3         | 4.91 |
| 406 | Copb1    | 5.55 | 406 | Abce1         | 5.04 |
| 407 | Acsl4    | 5.55 | 407 | Eif3a         | 5.13 |
| 408 | Ubr4     | 5.63 | 408 | Ubr4          | 5.20 |
| 409 | Aldh112  | 5.67 | 409 | Ctage5        | 5.21 |
| 410 | Usp9x    | 5.67 | 410 | Kntc1         | 5.21 |
| 411 | Ranbp2   | 5.70 | 411 | C330027C09Rik | 5.32 |
| 412 | Kpna2    | 5.73 | 412 | Sympk         | 5.39 |
| 413 | Copg     | 5.75 | 413 | Prpf8         | 5.39 |
| 414 | Sympk    | 5.88 | 414 | Lars          | 5.49 |
| 415 | Hsd17b12 | 5.91 | 415 | Tln1          | 5.52 |
| 416 | Lars     | 5.95 | 416 | Ranbp2        | 5.55 |
| 417 | Ckap5    | 6.07 | 417 | Mon2          | 5.55 |
| 418 | Prpf8    | 6.09 | 418 | Copg          | 5.67 |
| 419 | Tln1     | 6.15 | 419 | AI314180      | 5.82 |
| 420 | AI314180 | 6.30 | 420 | Cnot1         | 5.91 |

|     |        |      |     |        |      |
|-----|--------|------|-----|--------|------|
| 421 | Cnot1  | 6.43 | 421 | Plec   | 6.41 |
| 422 | Gcn111 | 6.85 | 422 | Gcn111 | 6.53 |
| 423 | Mdn1   | 7.14 | 423 | Mdn1   | 6.77 |
